# Supplementary material
Source: PubMed Central journal article supplement (PMC6667181)
Supplement: NIHMS1030399-supplement-Table_S1-S4.pdf [file NIHMS1030399-supplement-Table_S1-S4.pdf]

| Top upregulated genes in radial glia |                                                                    |             |                          |
|--------------------------------------|--------------------------------------------------------------------|-------------|--------------------------|
| Gene symbol                          | Gene name                                                          | Fold change | padj*                    |
| <i>Shisa9</i>                        | Shisa Family Member 9                                              | 6.488       | 4.82 X 10 <sup>-72</sup> |
| <i>Gabra2</i>                        | Gamma-Aminobutyric Acid Type A Receptor Alpha2 Subunit             | 4.726       | 1.30 X 10 <sup>-24</sup> |
| <i>Diras2</i>                        | DIRAS Family GTPase 2                                              | 4.662       | 1.39 X 10 <sup>-48</sup> |
| <i>Pdzrn3</i>                        | PDZ Domain Containing Ring Finger 3                                | 4.391       | 1.40 X 10 <sup>-59</sup> |
| <i>Sema6d</i>                        | Semaphorin 6D                                                      | 4.088       | 1.19 X 10 <sup>-33</sup> |
| <i>Ptx3</i>                          | Pentraxin 3                                                        | 3.812       | 1.41 X 10 <sup>-38</sup> |
| <i>Tmem35</i>                        | Transmembrane Protein 35A                                          | 3.283       | 1.61 X 10 <sup>-20</sup> |
| <i>Gm26911</i>                       | Predicted gene 26911                                               | 3.250       | 1.14 X 10 <sup>-19</sup> |
| <i>Kremen1</i>                       | Kringle Containing Transmembrane Protein 1                         | 3.216       | 3.51 X 10 <sup>-35</sup> |
| <i>Itga6</i>                         | Integrin Subunit Alpha 6                                           | 3.148       | 1.95 X 10 <sup>-53</sup> |
| <i>Tmeff2</i>                        | Transmembrane Protein With EGF-Like And Follistatin-Like Domains 2 | 3.135       | 3.24 X 10 <sup>-27</sup> |
| <i>Adamts20</i>                      | ADAM Metallopeptidase With Thrombospondin Type 1 Motif 20          | 2.939       | 1.96 X 10 <sup>-29</sup> |
| <i>Lifr</i>                          | LIF Receptor Alpha                                                 | 2.821       | 8.01 X 10 <sup>-32</sup> |
| <i>Fosl2</i>                         | FOS Like 2, AP-1 Transcription Factor Subunit                      | 2.708       | 1.73 X 10 <sup>-17</sup> |
| <i>Fam78b</i>                        | Family With Sequence Similarity 78 Member B                        | 2.625       | 3.70 X 10 <sup>-15</sup> |
| <i>Dab2</i>                          | DAB2, Clathrin Adaptor Protein                                     | 2.611       | 2.69 X 10 <sup>-25</sup> |
| <i>Epha3</i>                         | EPH Receptor A3                                                    | 2.601       | 1.65 X 10 <sup>-15</sup> |
| <i>Cdh20</i>                         | Cadherin 20                                                        | 2.581       | 4.98 X 10 <sup>-27</sup> |
| <i>Filip1</i>                        | Filamin A Interacting Protein 1                                    | 2.579       | 1.08 X 10 <sup>-14</sup> |
| <i>Tox2</i>                          | TOX High Mobility Group Box Family Member 2                        | 2.521       | 6.56 X 10 <sup>-12</sup> |

**Table S1.** RNA-seq data from 4 biological replicates. All genes included in this list have WT values > 1.5 RPKM. The full list of up-regulated genes is provided in the supplementary material. \*Adjusted p-value.

| Top downregulated genes in radial glia |                                                             |             |                          |
|----------------------------------------|-------------------------------------------------------------|-------------|--------------------------|
| Gene symbol                            | Gene name                                                   | Fold change | padj*                    |
| <i>Col12a1</i>                         | Collagen Type XII Alpha 1 Chain                             | 0.217       | 1.24 X 10 <sup>-39</sup> |
| <i>Slc14a2</i>                         | Solute Carrier Family 14 Member 2                           | 0.239       | 5.37 X 10 <sup>-35</sup> |
| <i>Smoc1</i>                           | SPARC Related Modular Calcium Binding 1                     | 0.270       | 9.76 X 10 <sup>-20</sup> |
| <i>Palmd</i>                           | Palmdelphin                                                 | 0.296       | 6.13 X 10 <sup>-21</sup> |
| <i>Eva1c</i>                           | Eva-1 Homolog C                                             | 0.301       | 1.07 X 10 <sup>-22</sup> |
| <i>Dscaml1</i>                         | Down Syndrome Cell Adhesion Molecule Like 1                 | 0.327       | 1.35 X 10 <sup>-15</sup> |
| <i>Tox</i>                             | Thymocyte Selection Associated High Mobility Group Box      | 0.330       | 1.64 X 10 <sup>-19</sup> |
| <i>Thsd4</i>                           | Thrombospondin Type 1 Domain Containing 4                   | 0.332       | 2.14 X 10 <sup>-28</sup> |
| <i>Mme</i>                             | Membrane Metalloendopeptidase                               | 0.334       | 8.13 X 10 <sup>-20</sup> |
| <i>Vit</i>                             | Vitrin                                                      | 0.354       | 2.96 X 10 <sup>-16</sup> |
| <i>Ankfn1</i>                          | Ankyrin Repeat And Fibronectin Type III Domain Containing 1 | 0.359       | 2.00 X 10 <sup>-10</sup> |
| <i>Adamts18</i>                        | ADAM Metallopeptidase With Thrombospondin Type 1 Motif 18   | 0.368       | 9.76 X 10 <sup>-20</sup> |
| <i>Meis1</i>                           | Meis Homeobox 1                                             | 0.383       | 3.18 X 10 <sup>-11</sup> |
| <i>AF529169</i>                        | AF529169 predicted gene                                     | 0.399       | 2.65 X 10 <sup>-08</sup> |
| <i>Htra1</i>                           | HtrA Serine Peptidase 1                                     | 0.426       | 3.06 X 10 <sup>-13</sup> |
| <i>Dapp1</i>                           | Dual Adaptor Of Phosphotyrosine And 3-Phosphoinositides 1   | 0.430       | 2.00 X 10 <sup>-13</sup> |
| <i>1500015O10Rik</i>                   | RIKEN 1500015O10 predicted gene                             | 0.434       | 2.92 X 10 <sup>-07</sup> |
| <i>Jag1</i>                            | Jagged 1                                                    | 0.438       | 5.38 X 10 <sup>-09</sup> |
| <i>Alk</i>                             | ALK Receptor Tyrosine Kinase                                | 0.453       | 6.74 X 10 <sup>-08</sup> |
| <i>Tmem108</i>                         | Transmembrane Protein 108                                   | 0.453       | 3.70 X 10 <sup>-06</sup> |

**Table S2.** RNA-seq data from 4 biological replicates. All genes included in this list have WT values > 1.5 RPKM. The full list of down-regulated genes is provided in the supplementary material. \*Adjusted p-value.

| Top upregulated genes in intermediate progenitors |                                                        |             |                          |
|---------------------------------------------------|--------------------------------------------------------|-------------|--------------------------|
| Gene symbol                                       | Gene name                                              | Fold change | padj*                    |
| <i>Ptx3</i>                                       | Pentraxin 3                                            | 7.174       | 4.56 X 10 <sup>-76</sup> |
| <i>Fosl2</i>                                      | FOS Like 2, AP-1 Transcription Factor Subunit          | 3.935       | 4.61 X 10 <sup>-31</sup> |
| <i>Pdzrn3</i>                                     | PDZ Domain Containing Ring Finger 3                    | 3.862       | 2.82 X 10 <sup>-80</sup> |
| <i>Rcan2</i>                                      | Regulator Of Calcineurin 2                             | 3.202       | 5.55 X 10 <sup>-19</sup> |
| <i>Thrb</i>                                       | Thyroid Hormone Receptor Beta                          | 3.039       | 2.91 X 10 <sup>-32</sup> |
| <i>Gabra2</i>                                     | Gamma-Aminobutyric Acid Type A Receptor Alpha2 Subunit | 2.751       | 1.99 X 10 <sup>-18</sup> |
| <i>Gm26911</i>                                    | Predicted gene 26911                                   | 2.713       | 1.60 X 10 <sup>-16</sup> |
| <i>Acpl2</i>                                      | Acid Phosphatase-Like Protein 2                        | 2.625       | 4.44 X 10 <sup>-24</sup> |
| <i>Slc35f1</i>                                    | Solute Carrier Family 35 Member F1                     | 2.392       | 1.22 X 10 <sup>-34</sup> |
| <i>3110035E14Rik</i>                              | RIKEN 3110035E14Rik predicted gene                     | 2.265       | 2.68 X 10 <sup>-13</sup> |
| <i>Abcc8</i>                                      | ATP Binding Cassette Subfamily C Member 8              | 2.112       | 2.63 X 10 <sup>-08</sup> |
| <i>Jam2</i>                                       | Junctional Adhesion Molecule 2                         | 1.934       | 1.77 X 10 <sup>-07</sup> |
| <i>Igsf11</i>                                     | Immunoglobulin Superfamily Member 11                   | 1.903       | 6.81 X 10 <sup>-06</sup> |
| <i>Lmo3</i>                                       | LIM Domain Only 3                                      | 1.902       | 4.30 X 10 <sup>-04</sup> |
| <i>Gm16701</i>                                    | Predicted gene 16701                                   | 1.893       | 1.26 X 10 <sup>-04</sup> |
| <i>Sez6l</i>                                      | Seizure Related 6 Homolog Like                         | 1.891       | 1.72 X 10 <sup>-09</sup> |
| <i>Fam196a</i>                                    | Family With Sequence Similarity 196 Member A           | 1.872       | 2.23 X 10 <sup>-04</sup> |
| <i>Itga6</i>                                      | Integrin Subunit Alpha 6                               | 1.867       | 2.52 X 10 <sup>-12</sup> |
| <i>Chrna3</i>                                     | Cholinergic Receptor Nicotinic Alpha 3 Subunit         | 1.851       | 4.64 X 10 <sup>-05</sup> |
| <i>Sypl2</i>                                      | Synaptophysin Like 2                                   | 1.847       | 5.14 X 10 <sup>-08</sup> |

**Table S3.** RNA-seq data from 4 biological replicates. All genes included in this list have WT values > 1.5 RPKM. The full list of up-regulated genes is provided in the supplementary material. \*Adjusted p-value.

| Top downregulated genes in intermediate progenitors |                                                 |             |                          |
|-----------------------------------------------------|-------------------------------------------------|-------------|--------------------------|
| Gene symbol                                         | Gene name                                       | Fold change | padj*                    |
| <i>Smoc1</i>                                        | SPARC Related Modular Calcium Binding 1         | 0.283       | 4.69 X 10 <sup>-16</sup> |
| <i>Dscaml1</i>                                      | Down Syndrome Cell Adhesion Molecule Like 1     | 0.305       | 4.46 X 10 <sup>-35</sup> |
| <i>Pbx3</i>                                         | PBX Homeobox 3                                  | 0.307       | 4.97 X 10 <sup>-19</sup> |
| <i>Tgfa</i>                                         | Transforming Growth Factor Alpha                | 0.390       | 9.66 X 10 <sup>-10</sup> |
| <i>Arfgef 3</i>                                     | Arfgef Family Member 3                          | 0.408       | 9.94 X 10 <sup>-22</sup> |
| <i>Akap12</i>                                       | A-Kinase Anchoring Protein 12                   | 0.433       | 1.19 X 10 <sup>-21</sup> |
| <i>Pou3f1</i>                                       | POU Class 3 Homeobox 1                          | 0.434       | 4.21 X 10 <sup>-10</sup> |
| <i>Gm13404</i>                                      | Predicted gene 13404                            | 0.477       | 2.50 X 10 <sup>-07</sup> |
| <i>Dusp26</i>                                       | Dual Specificity Phosphatase 26                 | 0.480       | 1.27 X 10 <sup>-05</sup> |
| <i>Ube2ql1</i>                                      | Ubiquitin Conjugating Enzyme E2 Q Family Like 1 | 0.490       | 2.07 X 10 <sup>-10</sup> |
| <i>Nrarp</i>                                        | NOTCH Regulated Ankyrin Repeat Protein          | 0.504       | 3.55 X 10 <sup>-09</sup> |
| <i>Plch2</i>                                        | Phospholipase C Eta 2                           | 0.504       | 1.06 X 10 <sup>-12</sup> |
| <i>Lama5</i>                                        | Laminin Subunit Alpha 5                         | 0.507       | 1.90 X 10 <sup>-08</sup> |
| <i>Trim9</i>                                        | Tripartite Motif Containing 9                   | 0.519       | 3.20 X 10 <sup>-07</sup> |
| <i>Gm12968</i>                                      | Predicted gene 12968                            | 0.524       | 3.73 X 10 <sup>-04</sup> |
| <i>Kif26b</i>                                       | Kinesin Family Member 26B                       | 0.534       | 3.00 X 10 <sup>-11</sup> |
| <i>Loxl1</i>                                        | Lysyl Oxidase Like 1                            | 0.535       | 2.30 X 10 <sup>-05</sup> |
| <i>Sorl1</i>                                        | Sortilin Related Receptor 1                     | 0.536       | 5.69 X 10 <sup>-08</sup> |
| <i>C79798</i>                                       | Expressed sequence C79798                       | 0.537       | 1.47 X 10 <sup>-03</sup> |
| <i>Rasa3</i>                                        | RAS P21 Protein Activator 3                     | 0.542       | 6.58 X 10 <sup>-07</sup> |

**Table S4.** RNA-seq data from 4 biological replicates. All genes included in this list have WT values > 1.5 RPKM. The full list of down-regulated genes is provided in the supplementary material. \*Adjusted p-value.
